# Supplementary material
Source: publisher figshare collection journal article supplement (https://frontiersin.figshare.com/ndownloader/files/13354979)
Supplement: Supplementary file [file 13354979]

## Supplementary Material

### A comprehensive analysis of the association between *SNCA* polymorphisms with the risk of Parkinson's disease

Yuan Zhang<sup>1†</sup>, Li Shu<sup>1†</sup>, Qiying Sun<sup>2,3,4</sup>, Hongxu Pan<sup>1</sup>, Jifeng Guo<sup>1,3,4,6,7,8</sup>, Beisha Tang<sup>1,2,3,4,5,6,7,8\*</sup>

<sup>†</sup> These authors have contributed equally to this work and are co-first authors.

\* Correspondence: Beisha Tang [bstang7398@163.com](mailto:bstang7398@163.com)

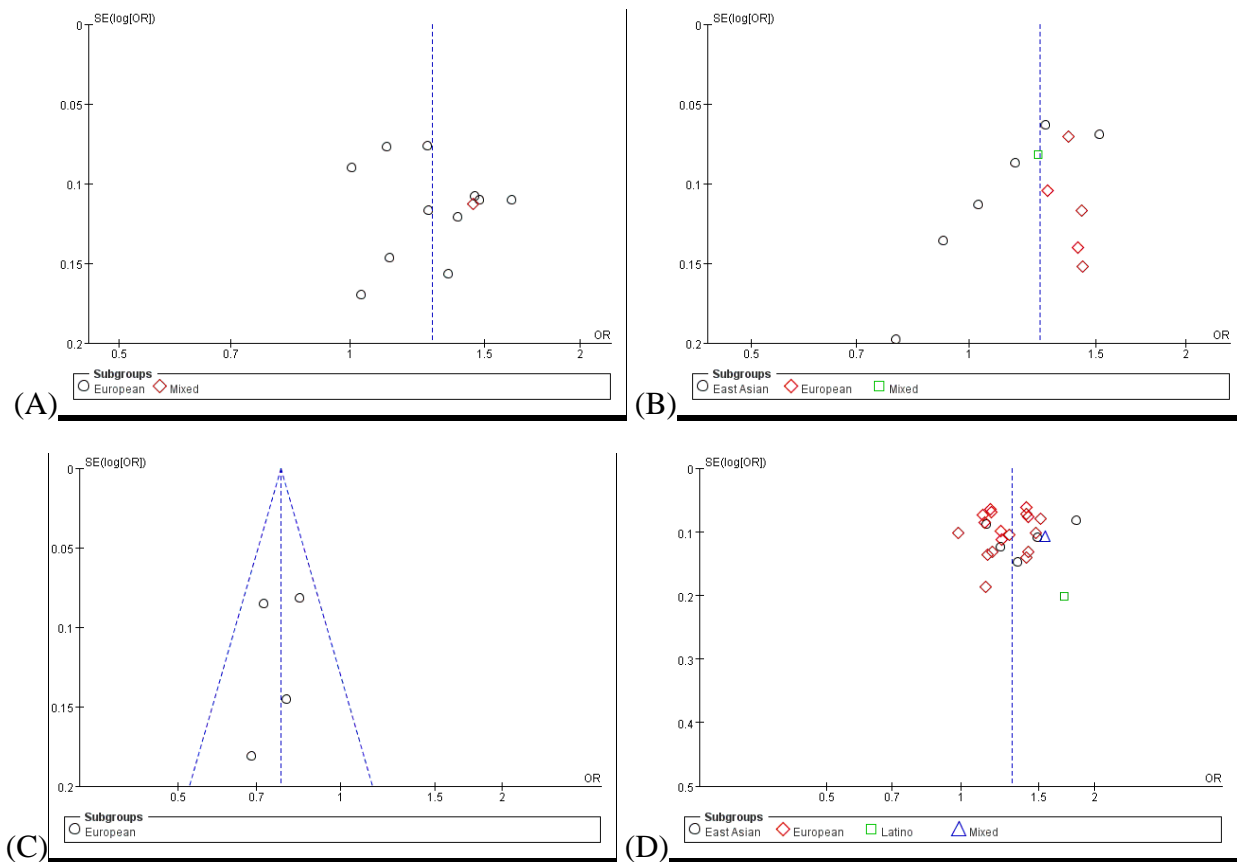

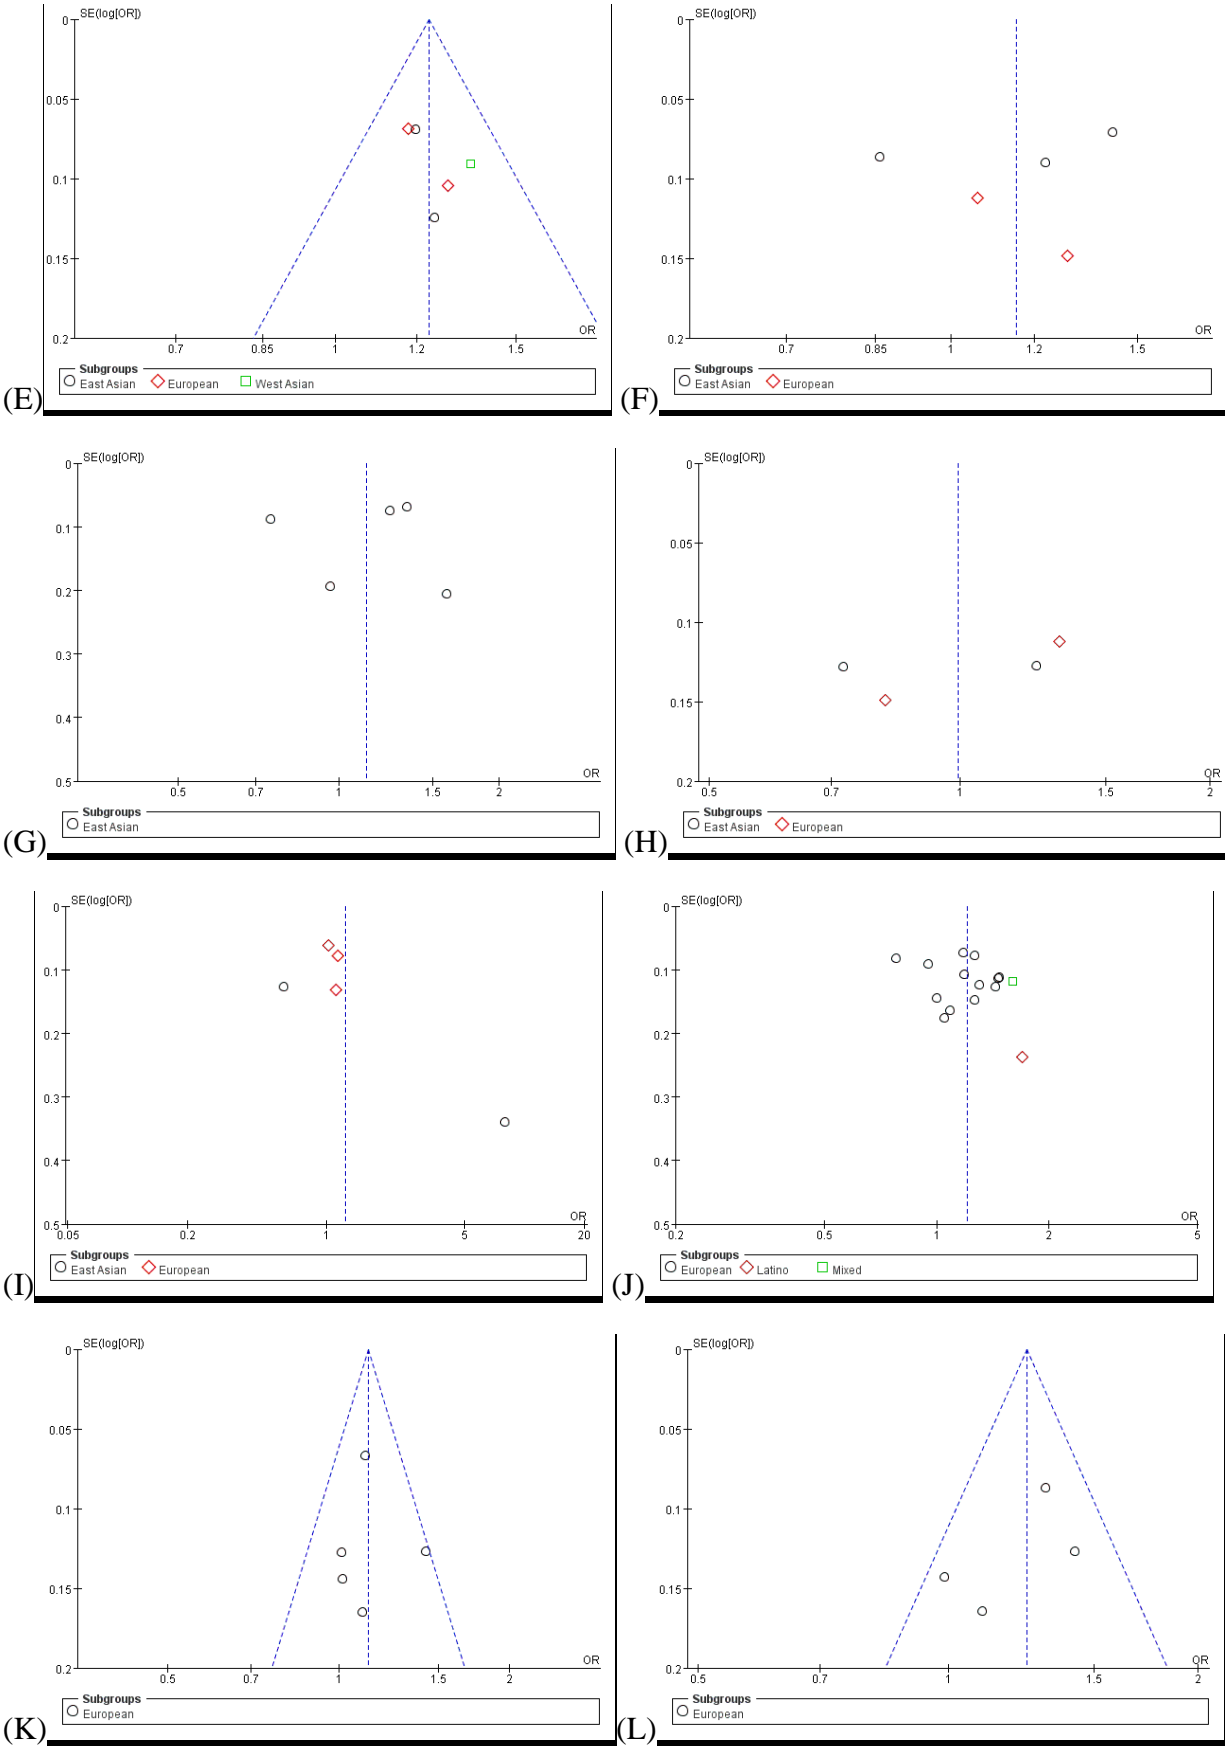

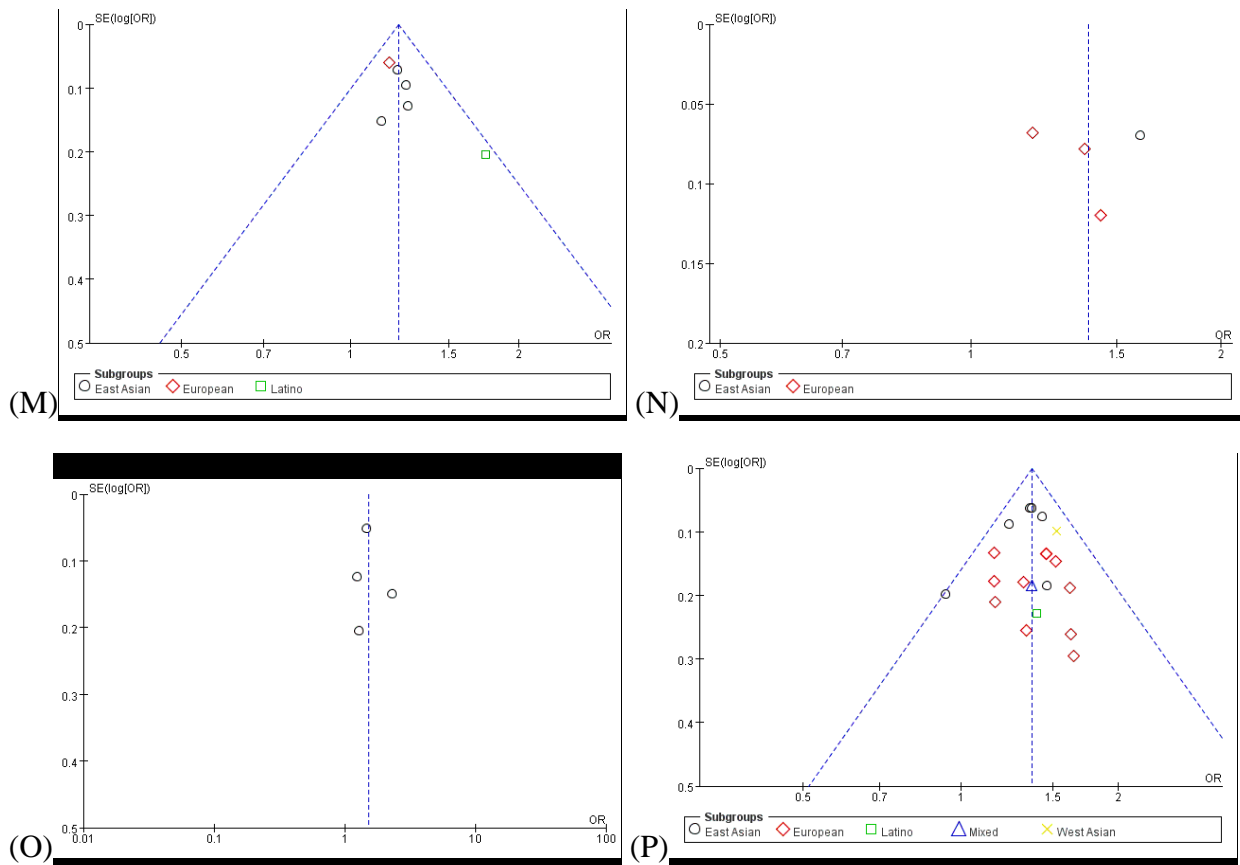

**Supplementary Figure 4:** Funnel plots of the association between each *SNCA* variant (allele) included and PD risks in total and by ethnicity. (A)-(P) were individually responsive to the variants rs181489(T), rs356165(G), rs356186(A), rs356219(G), rs356220(T), rs356221(A), rs894278(G), rs2301134(A), rs2301135(G), rs2583988(T), rs2619363(T), rs2619364(G), rs2736990(G), rs2737029(G), rs7684318(C), rs11931074(T).
